# Supplementary material for: Ligands enhanced the AcAc triple bond
Source: Royal Society of Chemistry journal article supplement (doi:10.1039/d1cp00014d), 2021-01-01
Supplement: d1cp00014d1.pdf [file d1cp00014d1.pdf]

## Supporting Information

### Ligands Enhanced Ac≡Ac Triple Bond

Xiao-Cheng Xu,<sup>a</sup> Xiao-Kun Zhao,<sup>a</sup> Han-Shi Hu\*

Table S1 EDA-NOCV results of H<sub>3</sub>PACAcPH<sub>3</sub> with four different sets of fragments with different charges and electronic states and the corresponding energy components (kcal/mol) at the PBE/TZ2P/TZP level.

| Fragments                                                                                                                        | $\Delta E_{\text{int}}$ | $\Delta E_{\text{pauli}}$ | $\Delta E_{\text{elstat}}$ | $\Delta E_{\text{orb}}$ |
|----------------------------------------------------------------------------------------------------------------------------------|-------------------------|---------------------------|----------------------------|-------------------------|
| H <sub>3</sub> PAC( <sup>4</sup> A <sub>1</sub> )+AcPH <sub>3</sub> ( <sup>4</sup> A <sub>1</sub> )                              | -49.35                  | 113.83                    | -78.15                     | -85.04                  |
| H <sub>3</sub> PAC*( <sup>3</sup> A <sub>1</sub> )+AcPH <sub>3</sub> ( <sup>3</sup> A <sub>1</sub> )                             | -140.49                 | 162.80                    | -167.72                    | -135.58                 |
| H <sub>3</sub> PAC <sup>2+</sup> ( <sup>2</sup> A <sub>1</sub> )+AcPH <sub>3</sub> <sup>2-</sup> ( <sup>2</sup> A <sub>1</sub> ) | -458.48                 | 265.20                    | -443.08                    | -280.60                 |
| H <sub>3</sub> PAC <sup>3+</sup> ( <sup>1</sup> A <sub>1</sub> )+AcPH <sub>3</sub> <sup>3-</sup> ( <sup>1</sup> A <sub>1</sub> ) | -979.25                 | 188.57                    | -712.25                    | -455.58                 |

Table S2 EDA-NOCV energies of the frontier electrons between Ac<sub>2</sub> unit of other compounds at the PBE/TZ2P/TZP level.

|                                           | H <sub>3</sub> AsAcAcAsH <sub>3</sub> | H <sub>3</sub> PACAcPH <sub>3</sub> | OCACAcCO      | ONAcAcNO      | H <sub>3</sub> NACAcNH <sub>3</sub> |
|-------------------------------------------|---------------------------------------|-------------------------------------|---------------|---------------|-------------------------------------|
| $\Delta E_{\text{ord}}^{\sigma-s}$        | -9.55(10.5%)                          | -8.88(10.4%)                        | -12.37(16.7%) | -13.15(18.7%) | -5.79(9.4%)                         |
| $\Delta E_{\text{ord}}^{\sigma-d}$        | 0                                     | 0                                   | 0             | 0             | 0                                   |
| $\Delta E_{\text{ord}}^{\pi-d}$           | -76.58(84.1%)                         | -72.24(84.9%)                       | -57.08(76.9%) | -56.53(80.2%) | -53.37(86.5%)                       |
| $\Delta E_{\text{ord}}^{\pi-\text{rest}}$ | -4.91(5.4%)                           | -3.92(4.7%)                         | -4.80(6.5%)   | -0.81(1.1%)   | -2.54(4.1%)                         |
| $\Delta E_{\text{ord}}$                   | -91.04                                | -85.04                              | -74.25        | -70.49        | -61.70                              |

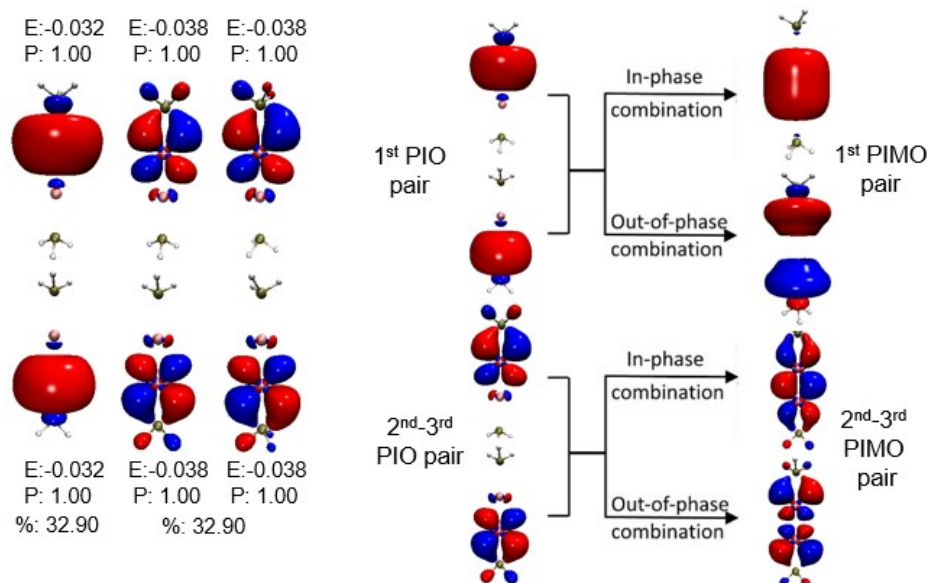

Fig. S1 The results of the PIO analysis for the equivalent fragments at the B3LYP/cc-pVTZ level. The main PIOs with the orbitals' energies, populations and the contributions of each pair to the total interactions are listed on the left. The main principal interacting molecular orbitals (PIMOs) are listed on the right.

Table S3 The electron densities ( $\rho$ ), potential densities (V), energy densities (H) and the electron density Laplacian  $\nabla^2\rho$  of the Ac-Ac bond critical point of the six calculated compounds and the corresponding Ac-Ac bond lengths at the B3LYP/cc-pVTZ level.

| Compounds                             | Ac-Ac(Å) | $\rho$ | V       | H       | $\nabla^2\rho$ |
|---------------------------------------|----------|--------|---------|---------|----------------|
| H <sub>3</sub> AsAcAcAsH <sub>3</sub> | 3.012    | 0.0298 | -0.0253 | -0.0028 | 0.0787         |
| H <sub>3</sub> PAcAcPH <sub>3</sub>   | 3.025    | 0.0300 | -0.0270 | -0.0025 | 0.0877         |
| OAcAcCO                               | 3.082    | 0.0288 | -0.0318 | 0.0003  | 0.1373         |
| HAcAcH                                | 3.255    | 0.0259 | -0.0243 | -0.0011 | 0.0879         |
| ONAcAcNO                              | 3.565    | 0.0161 | -0.0116 | -0.0005 | 0.0424         |
| H <sub>3</sub> NAcAcNH <sub>3</sub>   | 3.652    | 0.0130 | -0.0058 | -0.0018 | 0.0083         |
| R <sup>2</sup>                        |          | 0.9851 | 0.8854  | ---     | 0.6797         |

Table S4 The energy and compositions of the frontier MOs of H<sub>3</sub>PAcAcPH<sub>3</sub> and H<sub>3</sub>NAcAcNH<sub>3</sub> based on the fragment analysis at the PBE/TZ2P/TZP level.

|                                     | E(eV)                                   | Contribution (%) | MO      | Energy (eV) | Fragments       |
|-------------------------------------|-----------------------------------------|------------------|---------|-------------|-----------------|
| H <sub>3</sub> PAcAcPH <sub>3</sub> | 1 $\sigma_g^2$ 1 $\pi_u^4$              |                  |         |             |                 |
| 1 $\sigma_g$                        | -0.1166                                 | 80.50            | HOMO-1  | -0.127257   | Ac <sub>2</sub> |
|                                     |                                         | 16.10            | LOMO+1  | -0.07596    | Ac <sub>2</sub> |
|                                     |                                         | 2.47             | LOMO    | -0.017773   | PH <sub>3</sub> |
| 1 $\pi_u$                           | -0.1031                                 | 86.97            | HOMO    | -0.091068   | Ac <sub>2</sub> |
|                                     |                                         | 12.06            | LOMO+2  | -0.012729   | PH <sub>3</sub> |
| 1 $\sigma_u^*$                      | -0.0706                                 | 78.57            | LOMO    | -0.080585   | Ac <sub>2</sub> |
|                                     |                                         | 9.57             | LOMO+1  | -0.016410   | PH <sub>3</sub> |
|                                     |                                         | 7.94             | LOMO+6  | -0.015147   | Ac <sub>2</sub> |
|                                     |                                         | 2.22             | LOMO+12 | 0.046528    | Ac <sub>2</sub> |
|                                     |                                         | 1.79             | LOMO+5  | 0.087443    | PH <sub>3</sub> |
| H <sub>3</sub> NAcAcNH <sub>3</sub> | 1 $\sigma_g^2$ 1 $\pi_u^4$ 1 $\pi_g^*2$ |                  |         |             |                 |
| 1 $\sigma_g$                        | -0.1429                                 | 90.53            | HOMO-2  | -0.165938   | Ac <sub>2</sub> |
|                                     |                                         | 5.33             | LOMO    | -0.103737   | Ac <sub>2</sub> |
|                                     |                                         | 2.58             | HOMO    | -0.222067   | NH <sub>3</sub> |
| 1 $\pi_u$                           | -0.1109                                 | 98.84            | HOMO    | -0.110883   | Ac <sub>2</sub> |
| 1 $\sigma_u^*$                      | -0.1004                                 | 95.31            | HOMO-1  | -0.115767   | Ac <sub>2</sub> |
|                                     |                                         | 2.41             | LOMO+1  | -0.013788   | NH <sub>3</sub> |
|                                     |                                         | 1.82             | LOMO+14 | 0.020089    | Ac <sub>2</sub> |

Table S5 The change of electronic energy ( $\Delta E$ ) and Gibbs free energy ( $\Delta G$ ) for the reactions of Ac<sub>2</sub>(g) + 2L(g) --> LAcAcL(g) (L = AsH<sub>3</sub>, PH<sub>3</sub>, CO, NO, NH<sub>3</sub>) at the PBE/TZ2P/TZP level.

| Compounds                             | $\Delta E$ | $\Delta G$ |
|---------------------------------------|------------|------------|
| H <sub>3</sub> AsAcAcAsH <sub>3</sub> | -31.24     | 44.07      |
| H <sub>3</sub> PAcAcPH <sub>3</sub>   | -55.75     | 22.46      |
| OAcAcCO                               | -177.53    | -91.91     |

|                                     |         |         |
|-------------------------------------|---------|---------|
| ONAcAcNO                            | -471.27 | -383.35 |
| H <sub>3</sub> NAcAcNH <sub>3</sub> | -94.39  | -32.15  |

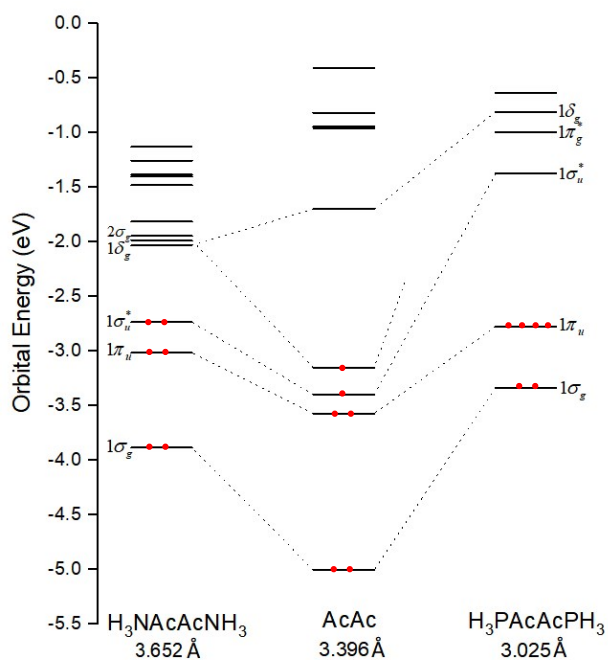

Fig. S2 The valence MO energy level diagrams of H<sub>3</sub>PAcAcPH<sub>3</sub> and H<sub>3</sub>NAcAcNH<sub>3</sub> and the corresponding Ac-Ac bond length at the PBE/TZ2P/TZP level.

The optimized geometry structure of all the compounds at the PBE/TZ2P/TZP level.

1, H<sub>3</sub>AsAcAcAsPH<sub>3</sub>

|    |           |           |           |
|----|-----------|-----------|-----------|
| Ac | 0.000000  | 0.000000  | -1.509720 |
| Ac | 0.000000  | 0.000000  | 1.509720  |
| H  | 1.076182  | 0.705416  | -5.512527 |
| H  | 0.072817  | -1.284708 | -5.512527 |
| H  | -1.148999 | 0.579293  | -5.512527 |
| H  | 0.072817  | 1.284708  | 5.512527  |
| H  | -1.148999 | -0.579293 | 5.512527  |
| H  | 1.076182  | -0.705416 | 5.512527  |
| As | 0.000000  | 0.000000  | 4.668131  |
| As | 0.000000  | 0.000000  | -4.668131 |

2, H<sub>3</sub>PAcAcPH<sub>3</sub>

|    |           |           |           |
|----|-----------|-----------|-----------|
| Ac | 0.000000  | 0.000000  | -1.512331 |
| Ac | 0.000000  | 0.000000  | 1.512331  |
| H  | 0.000000  | 1.214627  | -5.342044 |
| H  | 1.051898  | -0.607313 | -5.342044 |
| H  | -1.051898 | -0.607313 | -5.342044 |
| H  | 0.000000  | -1.214627 | 5.342044  |

|   |           |          |           |
|---|-----------|----------|-----------|
| H | 1.051898  | 0.607313 | 5.342044  |
| H | -1.051898 | 0.607313 | 5.342044  |
| P | 0.000000  | 0.000000 | -4.567414 |
| P | 0.000000  | 0.000000 | 4.567414  |

### 3, OCAcAcCO

|    |          |          |           |
|----|----------|----------|-----------|
| Ac | 0.000000 | 0.000000 | -1.540763 |
| Ac | 0.000000 | 0.000000 | 1.540763  |
| C  | 0.000000 | 0.000000 | -4.086576 |
| C  | 0.000000 | 0.000000 | 4.086576  |
| O  | 0.000000 | 0.000000 | -5.252379 |
| O  | 0.000000 | 0.000000 | 5.252379  |

### 4, HAcAcH

|    |          |          |           |
|----|----------|----------|-----------|
| Ac | 0.000000 | 0.000000 | -1.627502 |
| H  | 0.000000 | 0.000000 | -3.813998 |
| Ac | 0.000000 | 0.000000 | 1.627502  |
| H  | 0.000000 | 0.000000 | 3.813998  |

### 5, ONAcAcNO

|    |          |          |           |
|----|----------|----------|-----------|
| Ac | 0.000000 | 0.000000 | -1.780295 |
| Ac | 0.000000 | 0.000000 | 1.780295  |
| O  | 0.000000 | 0.000000 | -5.253317 |
| O  | 0.000000 | 0.000000 | 5.253317  |
| N  | 0.000000 | 0.000000 | -4.034137 |
| N  | 0.000000 | 0.000000 | 4.034137  |

### 6, H<sub>3</sub>NAcAcNH<sub>3</sub>

|    |           |           |           |
|----|-----------|-----------|-----------|
| Ac | -0.002633 | 0.000732  | -1.826428 |
| Ac | -0.002292 | 0.000090  | 1.826430  |
| H  | 0.382594  | 0.878641  | -4.932135 |
| H  | 0.571287  | -0.769643 | -4.931904 |
| H  | -0.950563 | -0.108905 | -4.934771 |
| H  | -0.854724 | 0.431394  | 4.933378  |
| H  | 0.054172  | -0.956573 | 4.932905  |
| H  | 0.801703  | 0.524572  | 4.932542  |
| N  | 0.000350  | -0.000021 | -4.554682 |
| N  | 0.000221  | -0.000223 | 4.554674  |
